# Supplementary material
Source: PubMed Central journal article supplement (PMC11170459)
Supplement: jama-e249803-s002.pdf [file jama-e249803-s002.pdf]

## Data Sharing Statement

### Data

**Data available:** No

### Additional Information

**Explanation for why data not available:** Data sharing requests will be handled in accordance with The George Institute for Global Health (TGI) data sharing policy (<https://www.georgeinstitute.org.au/data-sharing-policy>).
